# Supplementary material for: What could we learn about climate sensitivity from variability in the surface temperature record?
Source: Copernicus journal article supplement (doi:10.5194/esd-11-709-2020), 2020-08-03
Supplement: Supplementary file [file esd-11-709-2020-supplement-title-page.pdf › esd-11-709-2020-supplement-title-page.pdf]

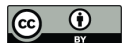

## *Supplement of*

# **What could we learn about climate sensitivity from variability in the surface temperature record?**

**James D. Annan et al.**

*Correspondence to:* James D. Annan ([jdannan@blueskiesresearch.org.uk](mailto:jdannan@blueskiesresearch.org.uk))

- [esd-11-709-2020-supplement-title-page.pdf](#)
- [tarfile](#)

The copyright of individual parts of the supplement might differ from the CC BY 4.0 License.
